# Supplementary material for: Surface-segregating zwitterionic copolymers to control poly(dimethylsiloxane) surface chemistry
Source: Royal Society of Chemistry journal article supplement (doi:10.1039/d3tb02164e), 2023-11-27
Supplement: d3tb02164e1.pdf [file d3tb02164e1.pdf]

## Supporting Information

*NMR Analysis:* The weight fraction of each monomer unit was determined using  $^1\text{H-NMR}$  analysis. Copolymer composition was determined through quantitative analysis by integrating distinct monomer peaks within the  $^1\text{H-NMR}$  spectra,  $\delta = 3.75$  ppm (f) for MPC, and  $\delta = 0.63$  ppm (e, g) for PDMS (Figure 3). The integration of these peaks was used to calculate the weight fraction of each monomer unit in the copolymer.

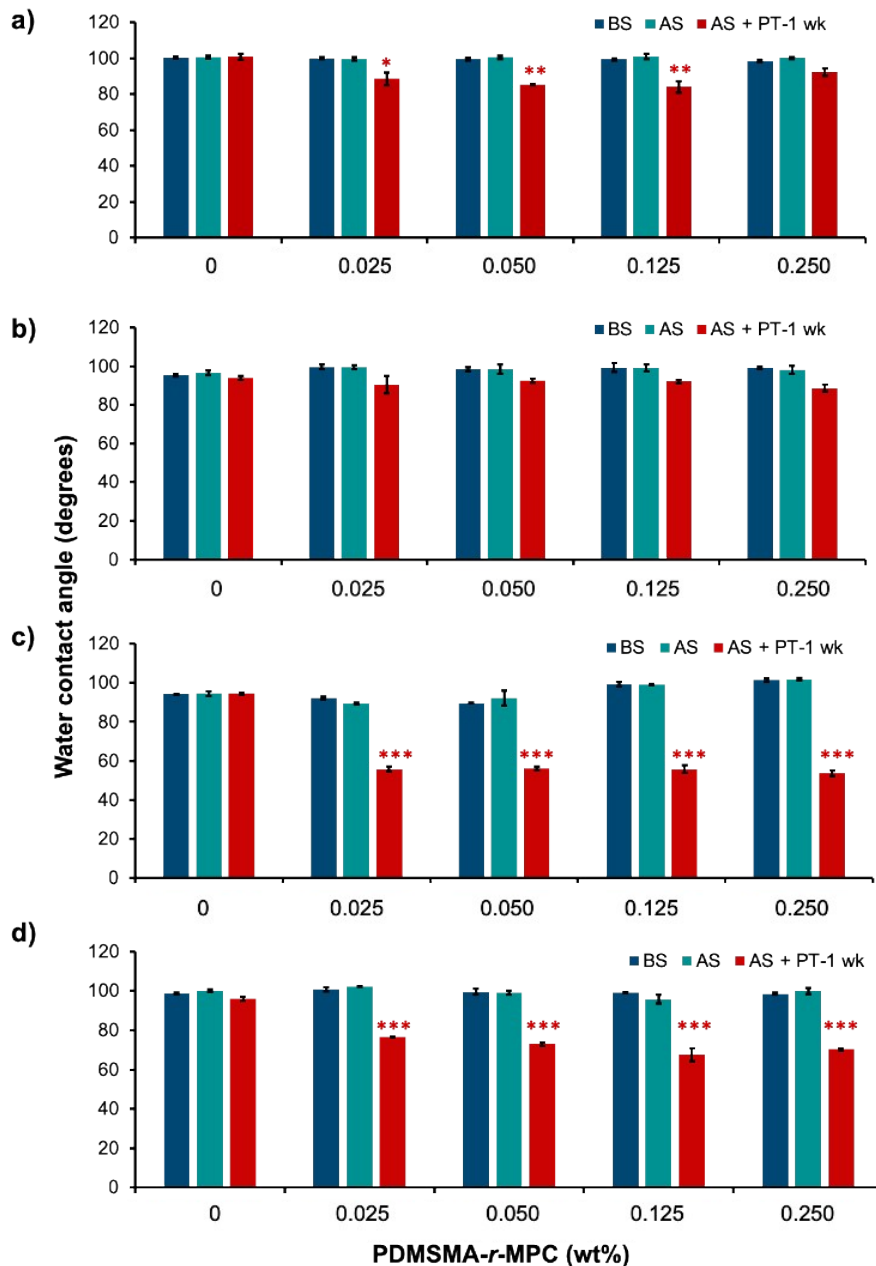

**Figure S1.** Final ( $t=45$ ) WCA comparison of CP-blended PDMS samples (0.025 - 0.25 wt %) before IPA soaking (BS), and after IPA soaking (AS). PDMS prepolymer blended with PDMSMA: MPC mass ratio of **a)** 90/10 (CP-5), **b)** 80/20 (CP-6), **c)** 70/30 (CP-7), and **d)** 60/40 (CP-8). The data are the mean  $\pm$  SE ( $N = 3$ ). We use  $* \leq 0.05$ ,  $** \leq 0.01$ ,  $***: p \leq 0.001$  by Tukey-test for significance comparisons between the controls and CP-blended PDMS groups. Unless specified, non-significant (n.s.) differences were obtained between the PDMS and CP-blended PDMS groups by Tukey-test for significance comparisons.

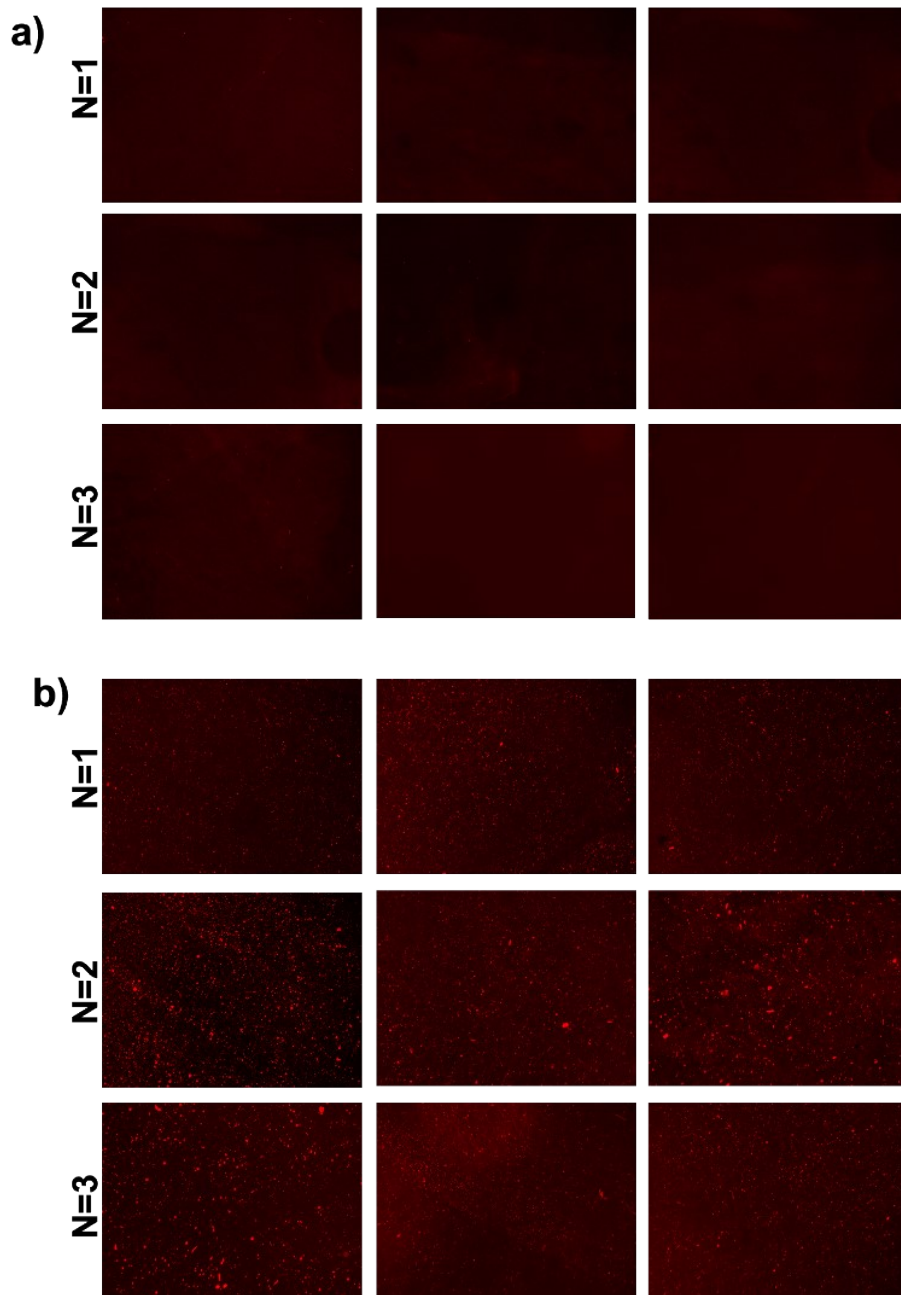

**Figure S2. Rhodamine 6G staining confirmed the presence of MPC units on the surface of CP-blended PDMS.** Staining images of a) PDMS and b) CP-blended PDMS (0.25 wt%). The specific interaction of rhodamine 6G with MPC enabled clear visualization of the copolymer on the surfaces. The images were captured using a fluorescence microscope (RFP filter) from three different batches (N=3), with three different areas in each sample. Experiments were performed 1 day after plasma treatment

and subsequently after 24 h IPA soaking. PDMSMA/MPC wt%: 70/30 (CP-7). Image scale bar: 400  $\mu\text{m}$ .

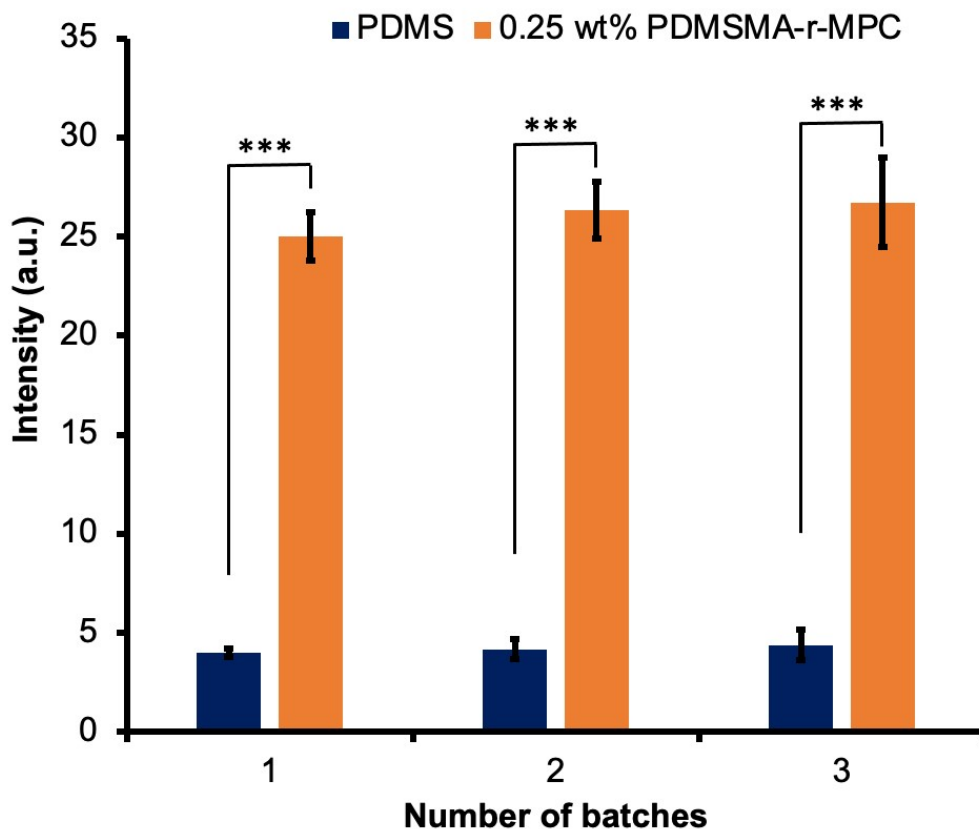

**Figure S3. Fluorescence microscope image intensities of PDMS and CP-blended PDMS (0.25 wt%) after Rhodamine 6G staining.** No significant difference was observed among different batches of CP-blended PDMS, confirming the homogeneous distribution of MPC on the surface. The fluorescence image intensity of samples was quantified using ImageJ. Three different batches (N=3), with three distinct areas in each sample were analyzed. PDMSMA/MPC wt%: 70/30 (CP-7). We use \*\*\*:  $p \leq 0.001$  by Tukey-test for significance comparisons between the PDMS and CP-blended PDMS groups. Unless specified, non-significant (n.s.) differences were obtained among PDMS batches and CP-blended PDMS batches by Tukey-test for significance comparisons.

**Table S1.** Transmittance of PDMS and CP-blended PDMS at 450 and 540 nm. PDMSMA: MPC wt%: 70/30 (CP-7). The data are the mean  $\pm$  SE (N = 3).

| PDMSMA-r-MPC (wt%) | @ 480 nm (BS)    | @ 480 nm (AS)    | @ 540 nm (BS)    | @ 540 nm (AS)    |
|--------------------|------------------|------------------|------------------|------------------|
| 0                  | 99.8 $\pm$ 0.002 | 100 $\pm$ 0.001  | 99.8 $\pm$ 0.002 | 100 $\pm$ 0.001  |
| 0.025              | 98.9 $\pm$ 0.001 | 98.6 $\pm$ 0.001 | 98.9 $\pm$ 0.001 | 98.7 $\pm$ 0.001 |
| 0.050              | 98.1 $\pm$ 0.004 | 97.0 $\pm$ 0.002 | 98.3 $\pm$ 0.004 | 97.3 $\pm$ 0.002 |
| 0.125              | 95.5 $\pm$ 0.005 | 94.4 $\pm$ 0.002 | 95.9 $\pm$ 0.005 | 94.8 $\pm$ 0.001 |
| 0.250              | 93.7 $\pm$ 0.002 | 84.0 $\pm$ 0.006 | 90.4 $\pm$ 0.002 | 85 $\pm$ 0.005   |

**Table S2.** Mechanical properties of PDMS and CP-blended PDMS. PDMSMA: MPC wt%: 70/30 (CP-7). The data are the mean  $\pm$  SE (N = 3).

| PDMSMA-r-MPC (wt%) | Young's modulus (MPa) | Young's modulus (MPa) (6 months storage) |
|--------------------|-----------------------|------------------------------------------|
| 0 <sup>a</sup>     | 1.3 $\pm$ 0.1         | 1.3 $\pm$ 0.1                            |
| 0                  | 1.2 $\pm$ 0.10        | 1.3 $\pm$ 0.02                           |
| 0.025              | 1.2 $\pm$ 0.03        | 1.1 $\pm$ 0.05                           |
| 0.050              | 1.4 $\pm$ 0.02        | 1.3 $\pm$ 0.02                           |
| 0.125              | 1.3 $\pm$ 0.02        | 1.4 $\pm$ 0.04                           |
| 0.250              | 1.3 $\pm$ 0.10        | 1.4 $\pm$ 0.03                           |

<sup>a</sup>Young's modulus of PDMS from literature. BS: Before IPA Soaking

The high compliance and flexibility of PDMS are one of its major advantages in microfluidics applications. The Young's modulus of a frequently used formulation, prepared with a prepolymer to curing agent ratio of 10:1, ranges from  $\sim$ 1.63 to 2.12 MPa. Preserving these mechanical properties during any modification is important.
